# Supplementary material
Source: bioRxiv or medRxiv preprint supplement (https://www.biorxiv.org/highwire/filestream/24454/field_highwire_adjunct_files/0/087411-1.pdf)
Supplement: Supplementary file [file 087411-1.pdf]

## 1 Supplementary Information: References from main paper:

|                       |    |           |   |           |     |       |        |     |           |     |     |
|-----------------------|----|-----------|---|-----------|-----|-------|--------|-----|-----------|-----|-----|
|                       |    | 1         |   |           |     |       |        |     |           |     |     |
| SP.P0C088.NLTP_ARTVU  | AL | TCSDVSNK  | I | SPCLSYLKO | G   | GEVPA | DCCA   | G   | VKG       | LND | --- |
| SP.P84160.NLTP_CITLI  | -  | ITCGQVTGS | L | APXIPFLRT | G   | ---   | ---    | --- | ---       | --- | --- |
| SP.P84161.NLTP_CITSI  | -  | ITXGQVTGS | L | APXIAFLRT | K   | ---   | ---    | --- | ---       | --- | --- |
| SP.P86333.NLTP_MUSAC  | -  | ITCSKVYGD | I | ISCVGYIKG | G   | ---   | PIACVG | Y   | LKGGPLQOY | VHN | --- |
| SP.P81430.ALL7_OLEEU  | A  | PSQSTVTAL | L | TSVSYIDD  | G   | ---   | ---    | --- | ---       | --- | --- |
| SP.P85204.NLTP1_ACTCH | A  | VSCGOVDTA | L | TPCL      | --- | ---   | ---    | --- | ---       | --- | --- |

Supplementary Fig. 1: **Six fragmented allergens in the current database:** P81430 Pollen allergen Ole e 7 (Uniprot id:P81430) does not have any homologous nsLTP. Other fragments have the following matches among other full length nsLTP:

P0C088: ACE07187.1 Art v 3 allergen precursor *Artemisia vulgaris*,

P84160: XP\_006429565.1 *Citrus clementina*,

P84161: KDO49687.1 *Citrus sinensis*,

P85204: P86137.2 *Actinidia deliciosa*,

P86333: XP\_009396870.1 *Musa acuminata subsp. malaccensis*,

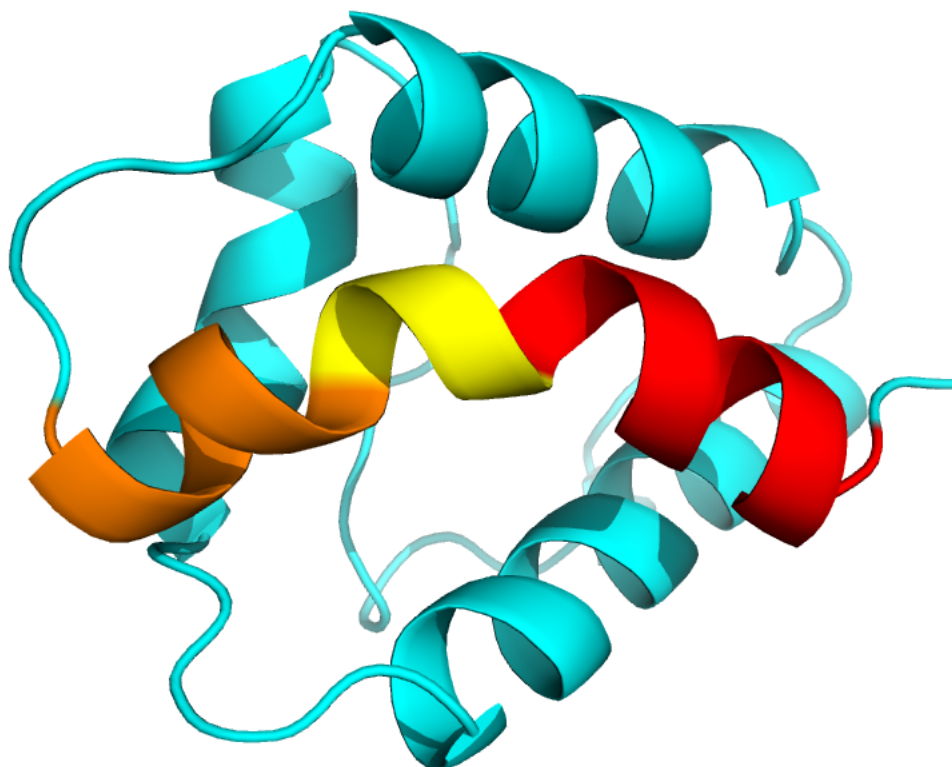

Supplementary Fig. 2: **Two  $\alpha$ -helices (AH) in nsLTP1 (PDBid:2ALGA) joined by a  $3_{10}$  AH:**  $3_{10}$  is in yellow. This appears visually as a single AH in PyMOL. The number of AHs in nsLTP1 is thus mis-reported as four [22].
